# Supplementary material for: Adiponectin modulates oxidative stress-induced mitophagy and protects C2C12 myoblasts against apoptosis
Source: PubMed Central journal article supplement (PMC5466641; doi:10.1038/s41598-017-03319-2), 2017-06-09
Supplement: 41598_2017_3319_MOESM1_ESM.pdf [file 41598_2017_3319_MOESM1_ESM.pdf]

# Adiponectin modulates oxidative stress-induced mitophagy and protects C2C12 myoblasts against apoptosis

Yinghui Ren<sup>a,†</sup>, Yan Li<sup>a,†</sup>, Jun Yan<sup>b,†</sup>, Mingkun Ma<sup>a,c</sup>, Dongmei Zhou<sup>a</sup>, Zhenyi Xue<sup>a</sup>,  
Zimu Zhang<sup>a</sup>, Hongkun Liu<sup>a</sup>, Huipeng Yang<sup>a</sup>, Long Jia<sup>a</sup>, Lijuan Zhang<sup>a</sup>, Qi Zhang<sup>a</sup>,  
Shuqin Mu<sup>b,\*</sup>, Rongxin Zhang<sup>a,d,\*</sup> and Yurong Da<sup>a,\*</sup>

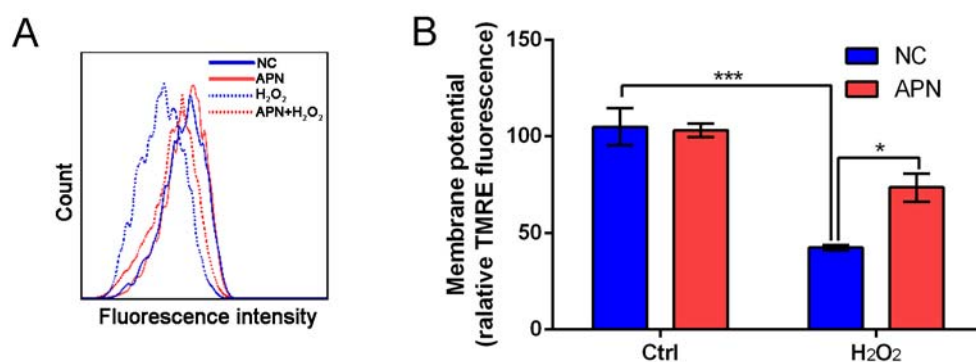

**Supplementary figure 1. Effect of APN on H<sub>2</sub>O<sub>2</sub>-induced mitochondrial membrane potential.** (A) C2C12 cells were transfected with 30  $\mu$ g/mL APN, and control cells were treated with 5 mM H<sub>2</sub>O<sub>2</sub> for 30 min and then incubated with TMRE (50 nM) for 30 min at 37°C. TMRE fluorescence intensity was measured using a flow cytometer. (B) The results are presented as the mean  $\pm$  SEM values obtained from three independent experiments (\* $p$ <0.05, \*\*\* $p$ <0.001).
